# Supplementary material for: A combined experimental and computational investigation on pyrene based D–π–A dyes
Source: Royal Society of Chemistry journal article supplement (doi:10.1039/c7cp08038g), 2018-01-01
Supplement: c7cp08038g1.pdf [file c7cp08038g1.pdf]

# **A Combined Experimental and Computational Investigation on Pyrene Based D- $\pi$ -A Dyes**

Themmila Khamrang,<sup>1</sup> Marappan Velusamy,<sup>1</sup> Madhavan Jaccob,<sup>2\*</sup> Mohan Ramesh,<sup>3</sup> Murugavel Kathiresan,<sup>4</sup> Arunkumar Kathiravan<sup>5\*</sup>

<sup>1</sup> Department of Chemistry, North Eastern Hill University, Shillong 793 022, Meghalaya, India

<sup>2</sup> Department of Chemistry, Loyola College, Chennai – 600 034, Tamil Nadu, India & Computational Chemistry Laboratory, Loyola Institute of Frontier Energy (LIFE), Loyola College, Chennai – 600 034, Tamil Nadu, India

<sup>3</sup> Functional Materials Division, CSIR-Central Electrochemical Research Institute, Karaikudi 630 003, Tamil Nadu India

<sup>4</sup> Electroorganic Division, CSIR-Central Electrochemical Research Institute, Karaikudi 630 003, Tamil Nadu, India

<sup>5</sup> National Centre for Ultrafast Processes, University of Madras, Taramani Campus, Chennai – 600 113, Tamil Nadu, India

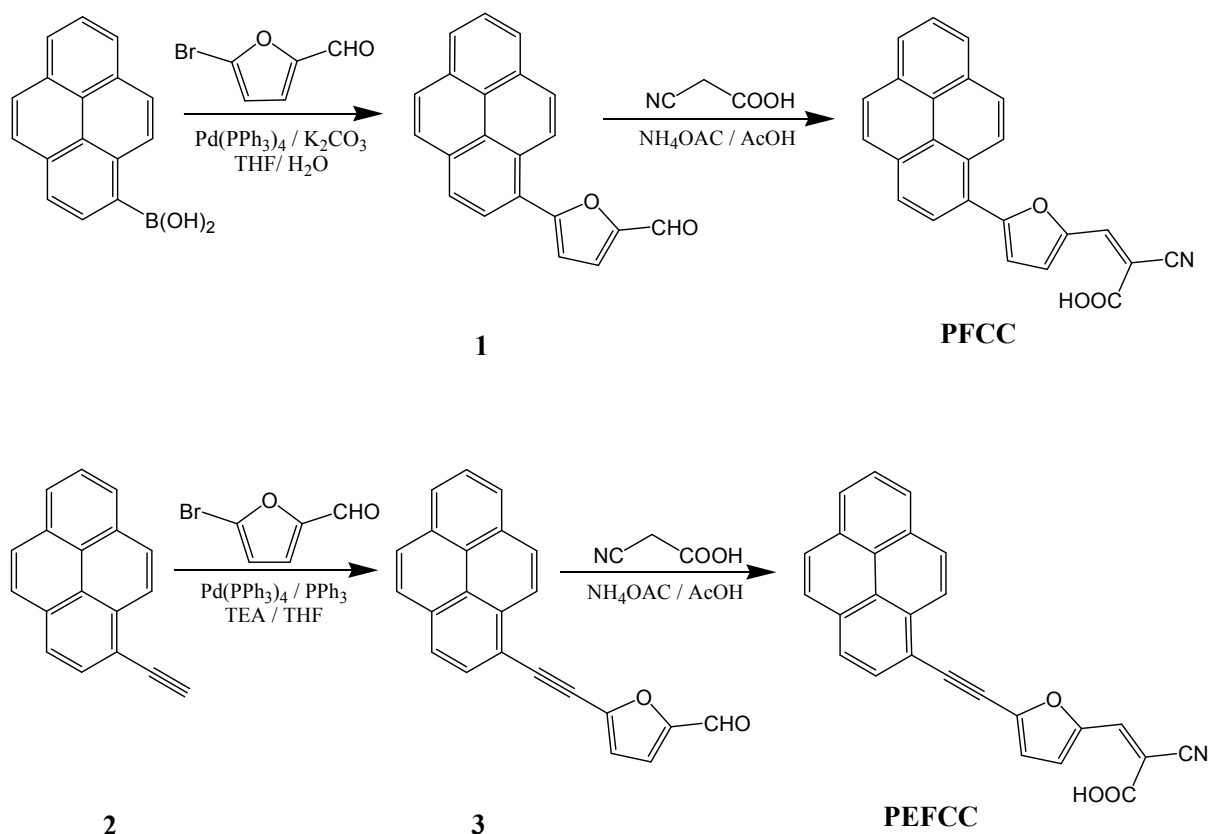

**Scheme S1:** Synthetic routes of pyrene derivatives.

#### Synthetic procedure:

**5-pyren-1-yl-furan-2-carbaldehyde (1).** Compound **1** was prepared according to our previous work<sup>S1</sup> starting from commercially available pyrene-1-boronic acid, 1-ethynylpyrene and 5-bromo-2-furaldehyde.

**2-cyano-3-(5-pyren-1-yl-furan-2-yl)-acrylic acid (PFCC).** A mixture of 5-pyren-1-yl-furan-2-carbaldehyde (0.296 g, 1.0 mmol), cyanoacetic acid (0.102g, 1.2mmol) and anhydrous ammonium acetate (0.038g, 0.5mmol) in 20 ml glacial acetic acid was heated under reflux for 8hours at argon atmosphere. After cooling, the reaction mixture was poured into the cold water; the precipitate formed was collected by filtration, washed with excess of water and dried. The crude product was purified in column chromatography (CHCl<sub>3</sub>: MeOH) to give red solid product. (0.152 g, 51% yield); <sup>1</sup>H NMR (DMSO-d<sub>6</sub>, 500 MHz) δ ppm: 8.96-8.94 (d, 1H, *J* = 10 Hz), 8.53-8.52 (d, 1H, *J* = 5 Hz), 8.39-8.36 (t, 3H, *J* = 7.5 Hz), 8.31-8.26 (m, 2H), 8.23-8.21 (d, 1H, *J* = 10 Hz), 8.14-8.12 (t, 1H, *J* = 5 Hz), 7.99 (s, 1H), 7.51-7.49 (t, 2H, *J* = 5 Hz); <sup>13</sup>C NMR (DMSO-d<sub>6</sub>, 500 MHz) δ ppm: 157.2, 149.92, 131.81, 131.42, 129.36, 128.86,

127.77, 127.33, 127.17, 126.57, 126.52, 125.7, 125.06, 124.8, 124.25, 123.79, 114.13; EI-MS ( $m/z$ ) 318 [ $M^+ - COOH$ ]

**5-pyren-1-ylethynyl-furan-2-carbaldehyde (3).** A mixture of 1-ethynylpyrene (0.50 g, 2.2 mmol), 5-bromo-2-furan carboxaldehyde (0.48 g, 3.3 mmol),  $Pd(PPh_3)_4$  (25 mg, 0.02 mmol), CuI (42 mg, 0.22 mmol) and  $PPh_3$  (50 mg, 0.22 mmol) were dissolved in 20 ml of freshly distilled THF and 10 ml of triethylamine and the resulting mixture was stirred at 100 °C overnight in an inert atmosphere. Finally the volatile solvent was evaporated in rotavapor and the residue was washed with brine and extracted from  $CHCl_3$ , dried in  $Na_2SO_4$  and solvent was evaporated. The crude product was purified in column chromatography (Hexane: ethylacetate) to give yellow solid (0.422 g, 60% yield).  $^1H$  NMR ( $CDCl_3$ , 500 MHz)  $\delta$  ppm: 9.7 (s, 1H), 8.6-8.58 (d, 1H,  $J = 10$  Hz), 8.28-8.26 (d, 1H,  $J = 10$  Hz), 8.25-8.20 (m, 3H), 8.16-8.14 (d, 2H,  $J = 10$  Hz), 8.08-8.04 (t, 2H,  $J = 10$  Hz), 7.34-7.33 (d, 1H,  $J = 5$  Hz), 6.94-6.93 (d, 1H,  $J = 5$  Hz);  $^{13}C$  NMR ( $CDCl_3$ , 500 MHz)  $\delta$  ppm: 177.21, 152.59, 142.35, 132.35, 132.29, 131.18, 130.97, 129.75, 129.08, 129.02, 127.18, 126.51, 126.18, 126.1, 125.09, 124.57, 124.39, 124.15, 117.16, 115.25, 96.14, 83.89. EI-MS ( $m/z$ ) 320 [ $M^+$ ].

**2-cyano-3-(5-pyren-1-ylethynyl-furan-2-yl)-acrylic acid (PEFCC).** The compound 5-pyren-1-ylethynyl-furan-2-carbaldehyde (0.20 g, 0.624 mmol), cyanoacetic acid (0.063g, 0.75mmol) and anhydrous ammonium acetate (0.02 g, 0.31mmol) in 20 ml glacial acetic acid was refluxed in oil bath at 120 °C overnight in an inert atmosphere. The mixture was cooled to room temperature, poured into ice cold water. The precipitate formed was filtered, washed with excess of water and dried. Finally red solid was obtained by purification through column chromatography ( $CHCl_3$ : MeOH, 95:5) to give red solid (0.31 g, 76 % yield).  $^1H$  NMR ( $DMSO-d_6$ , 400 MHz)  $\delta$  ppm: 8.36-8.32 (t, 1H,  $J = 8$  Hz), 8.27-8.21 (m, 3H), 8.18-8.11 (m, 3H), 8.08-8.06 (d, 1H,  $J = 8$  Hz), 8.02-7.98 (t, 1H,  $J = 8$  Hz), 7.82 (s, 1H), 7.31-7.30 (d, 1H,  $J = 4$  Hz), 7.22-7.21 (d, 1H,  $J = 4$  Hz);  $^{13}C$  NMR ( $DMSO-d_6$ , 400 MHz)  $\delta$  ppm: 149.85, 131.50, 131.11, 130.50, 130.18, 129.19, 126.96, 126.15, 124.76, 123.28, 123.02, 114.40, 95.43, 84.60, 72.21, 60.20; EI-MS ( $m/z$ ) 343 [ $M^+ - COOH$ ]

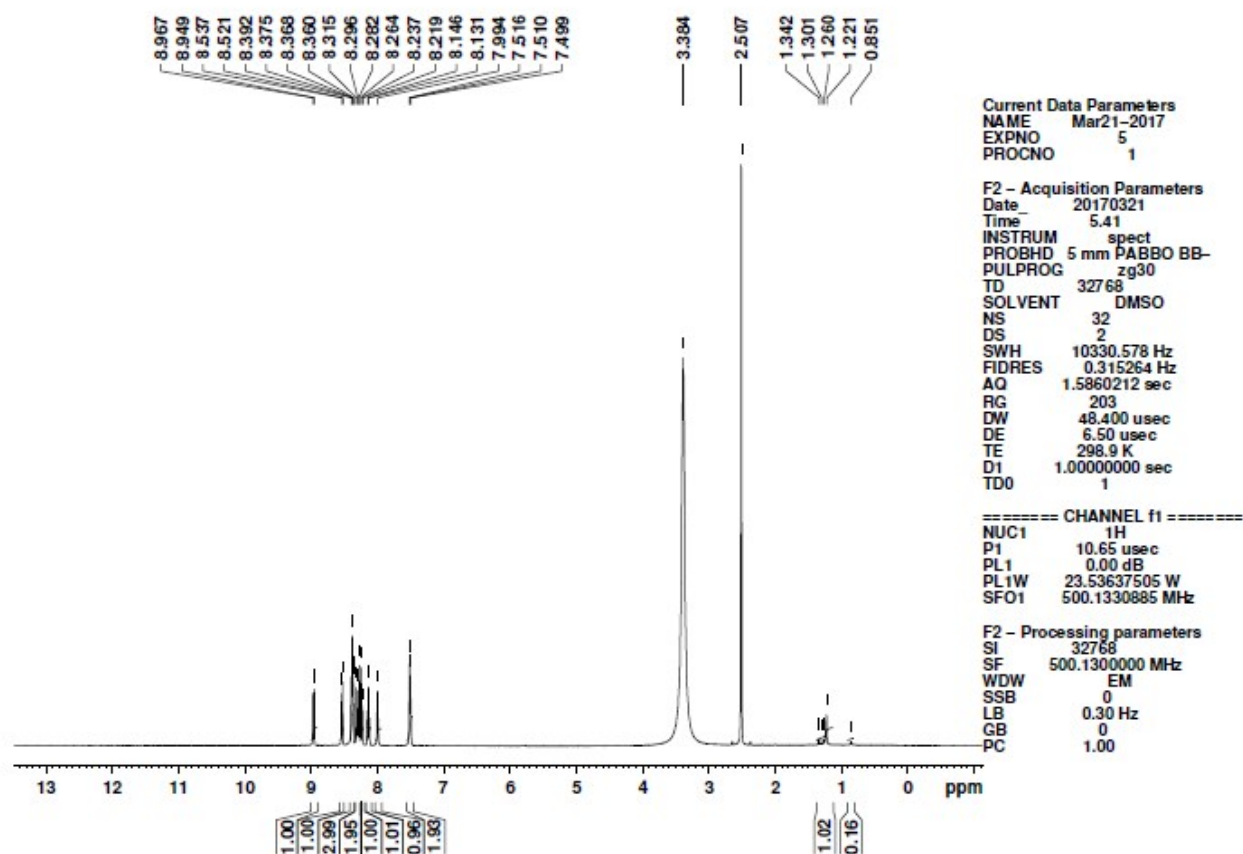

**Fig.S1:**  $^1\text{H}$  NMR of 2-Cyano-3-(5-pyren-1-yl-furan-2-yl)-acrylic acid (PFCC) in  $\text{DMSO-d}_6$

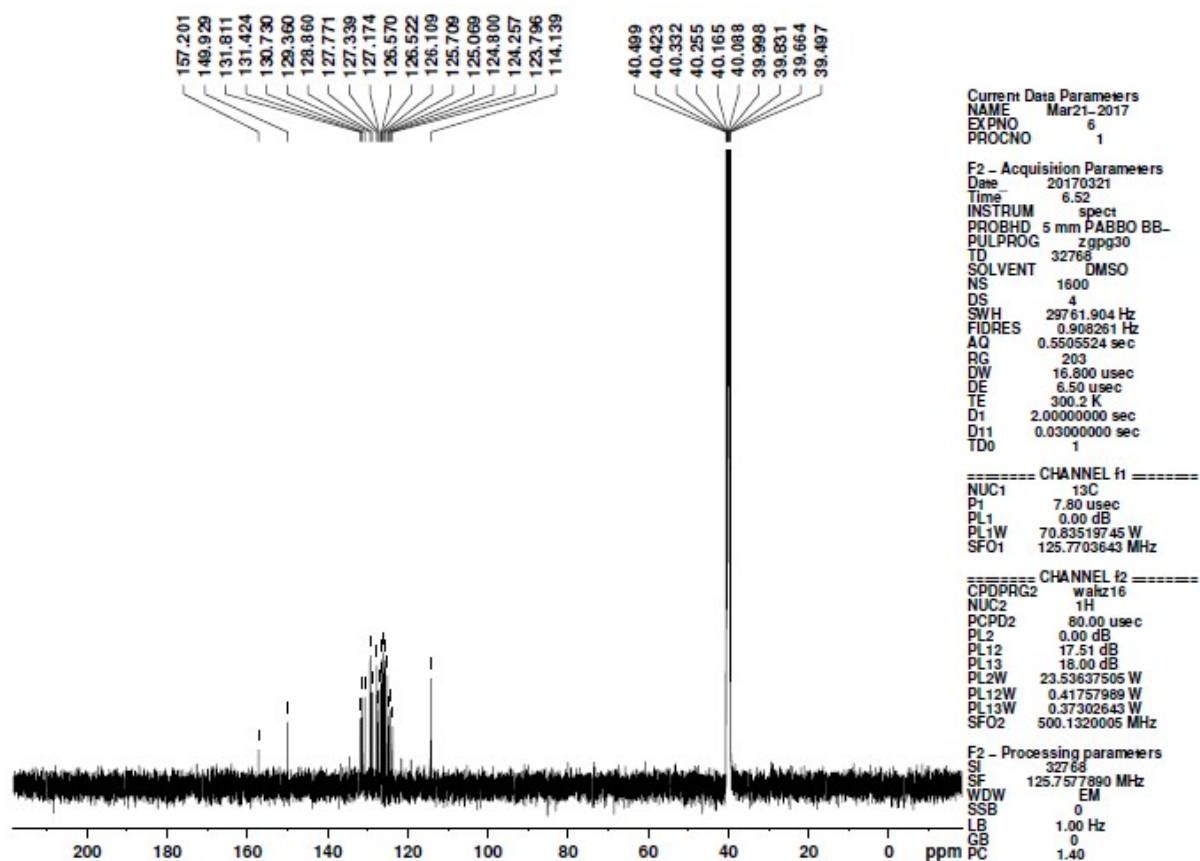

**Fig. S2:**  $^{13}\text{C}$  NMR of 2-Cyano-3-(5-pyren-1-yl-furan-2-yl)-acrylic acid (PFCC) in  $\text{DMSO-d}_6$

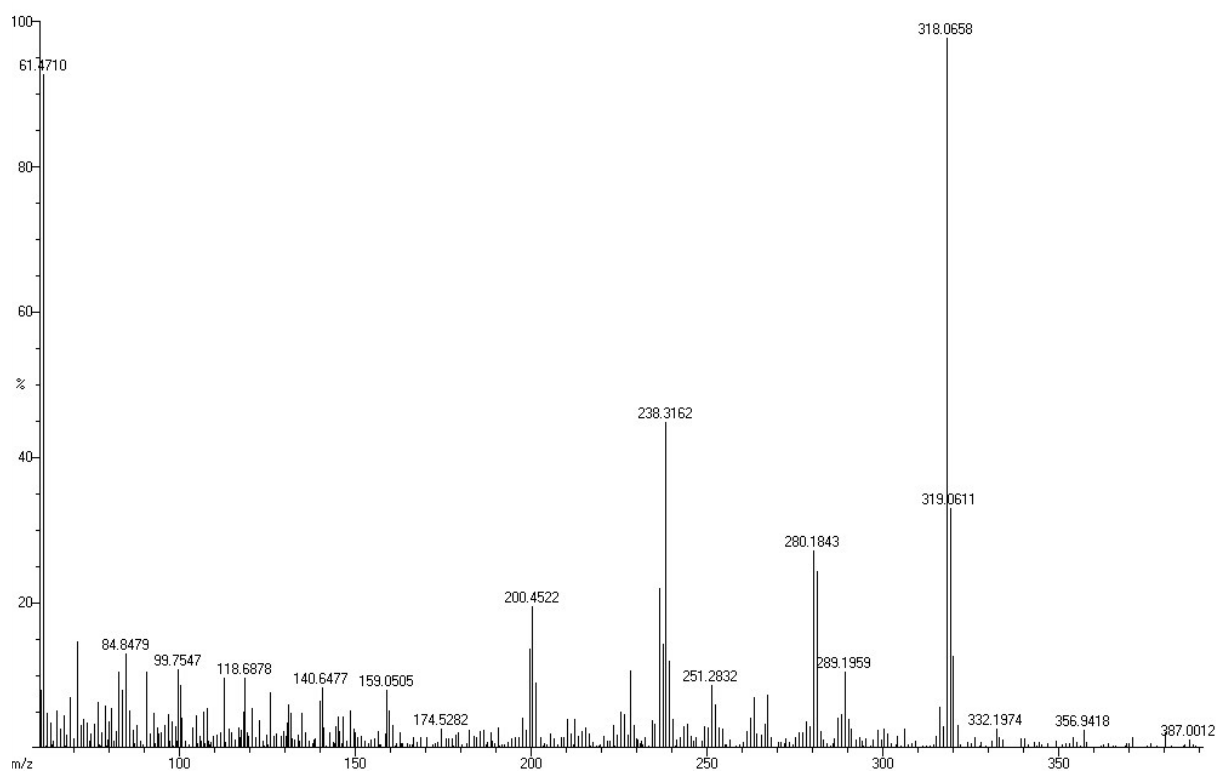

**Fig. S3:** EI-MASS Spectrum of 2-Cyano-3-(5-pyren-1-yl-furan-2-yl)-acrylic acid (PFCC).

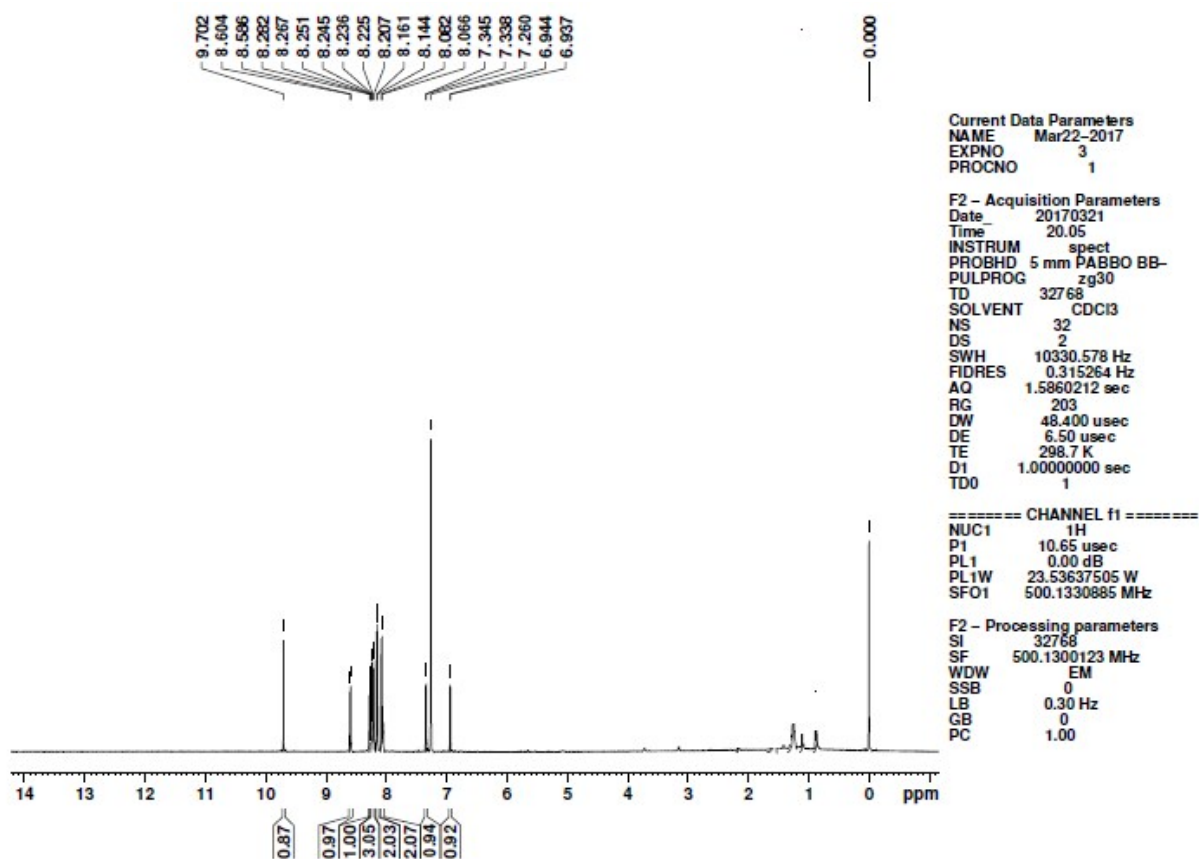

**Fig.S4:**  $^1\text{H}$  NMR of 5-Pyren-1-ylethynyl-furan-2-carbaldehyde (**3**) in  $\text{CDCl}_3$

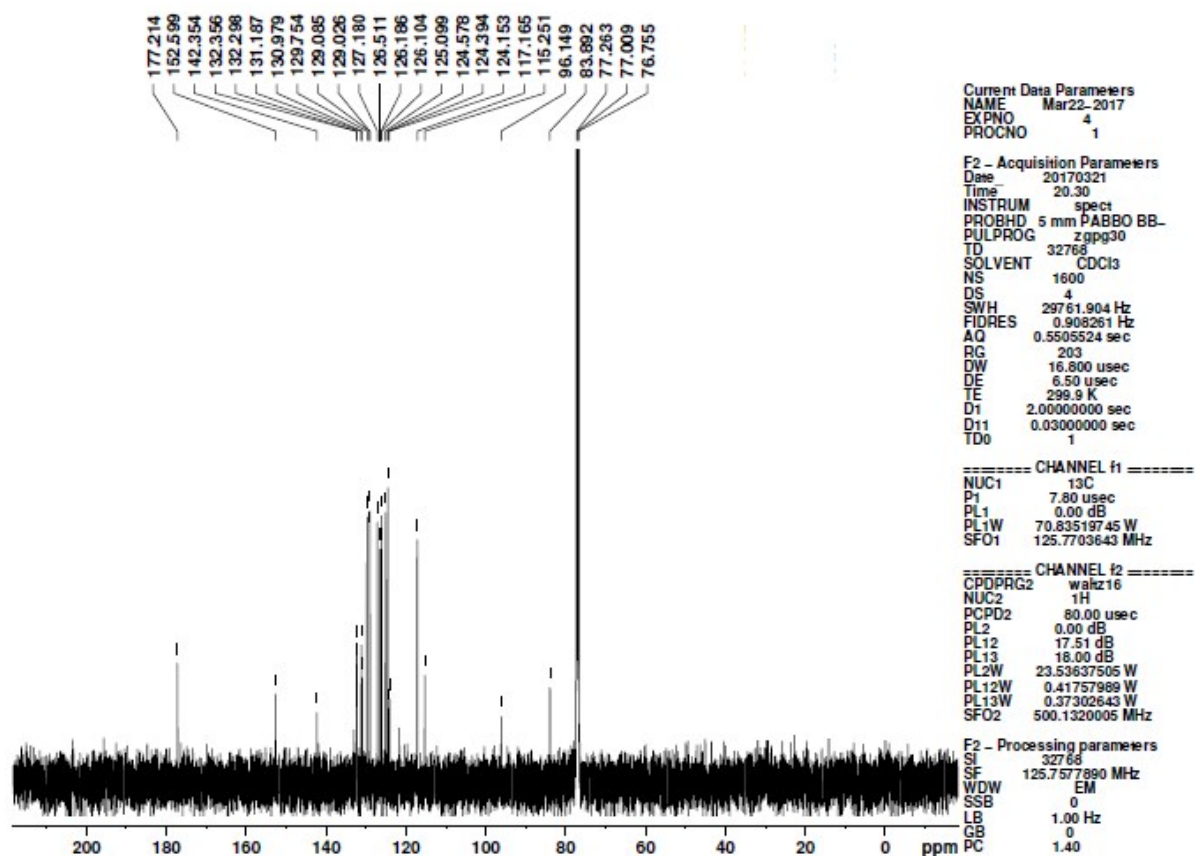

**Fig.S5:**  $^{13}\text{C}$  NMR of 5-Pyren-1-ylethynyl-furan-2-carbaldehyde (**3**) in  $\text{CDCl}_3$



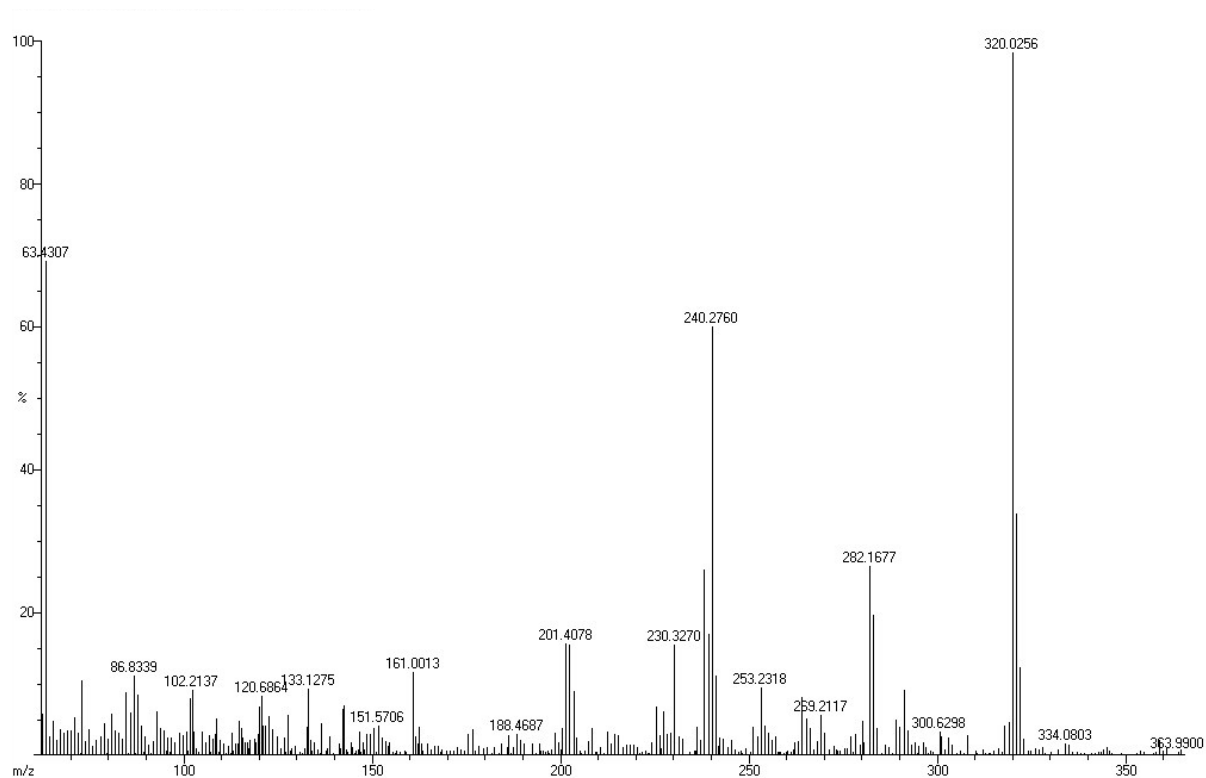

**Fig. S6:** EI-MASS Spectrum of 5-Pyren-1-ylethynyl-furan-2-carbaldehyde (**3**).

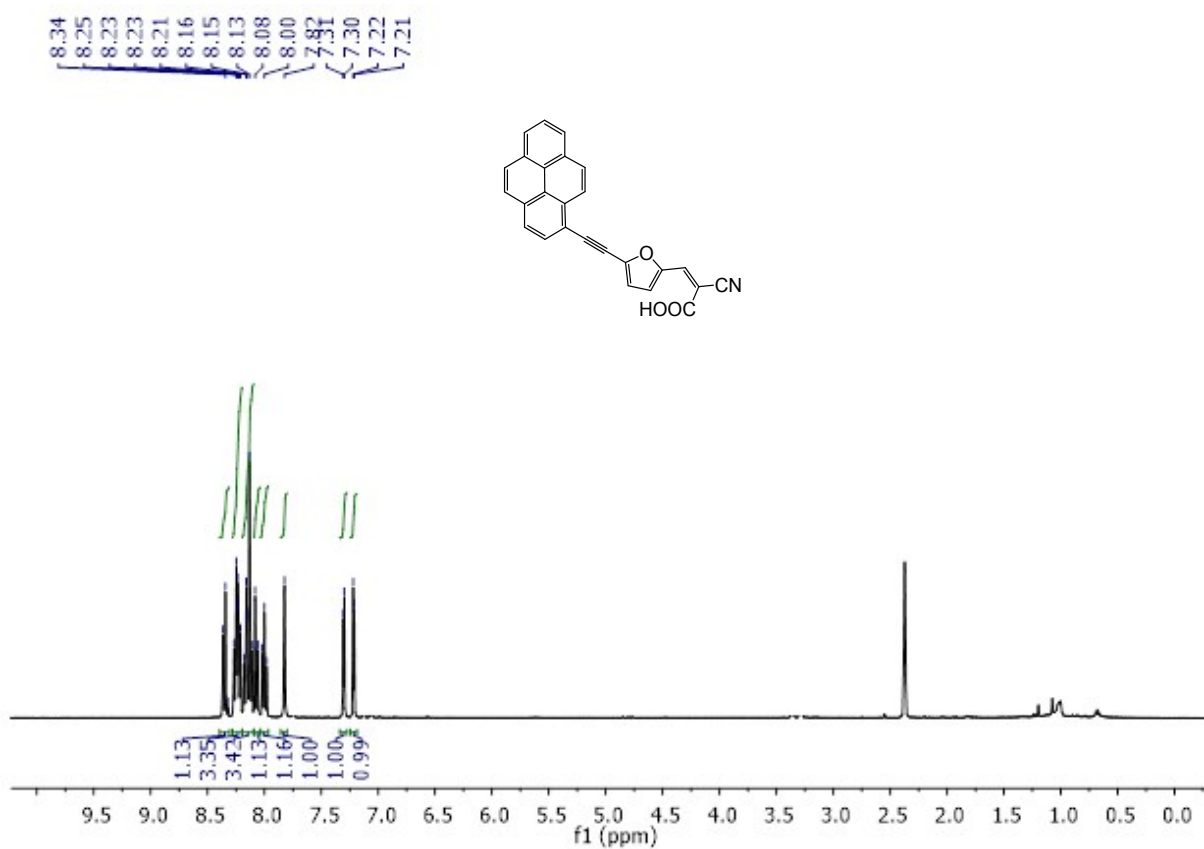

**Fig.S7:** <sup>1</sup>H NMR of 2-Cyano-3-(5-pyren-1-ylethynyl-furan-2-yl)-acrylic acid (PEFCC) in DMSO-d<sub>6</sub>

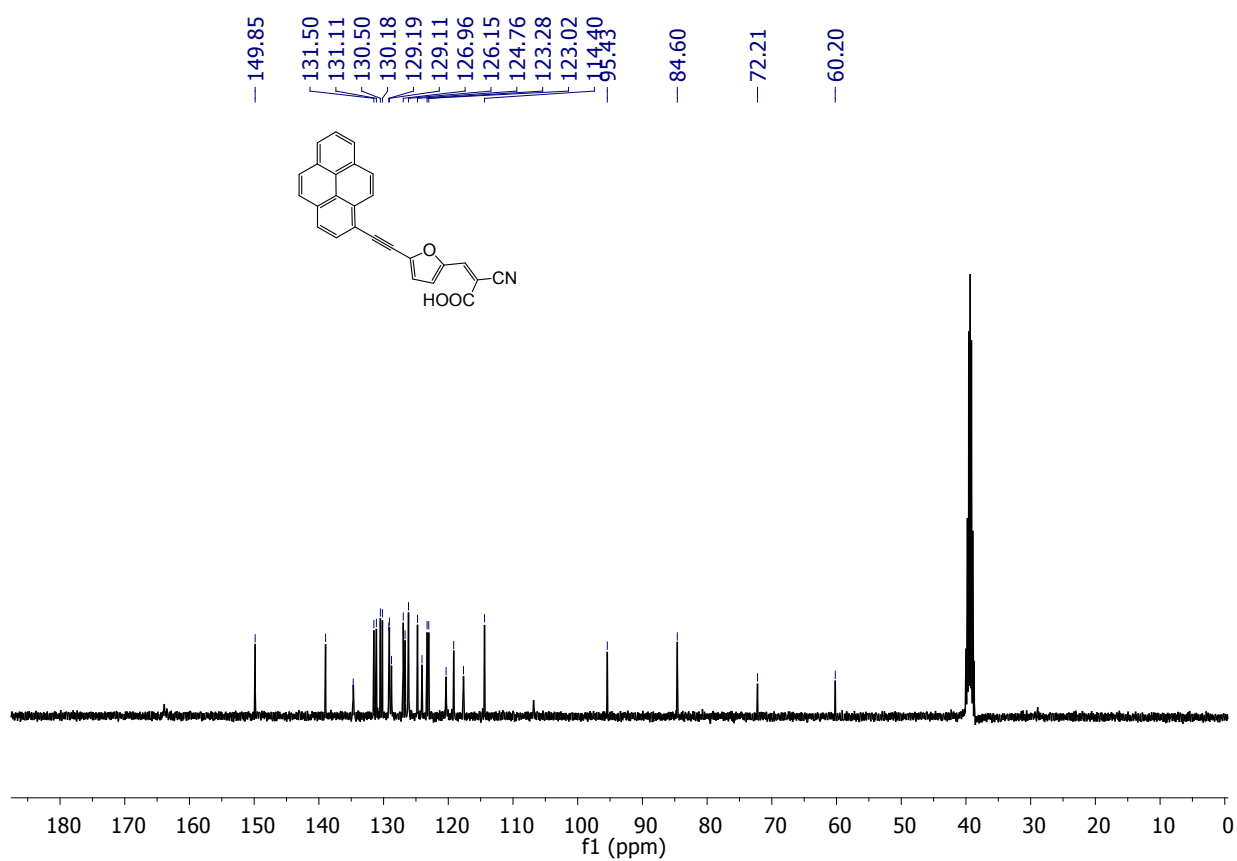

**Fig.S8:** <sup>13</sup>C NMR of 2-Cyano-3-(5-pyren-1-ylethynyl-furan-2-yl)-acrylic acid (PEFCC) in DMSO-d<sub>6</sub>

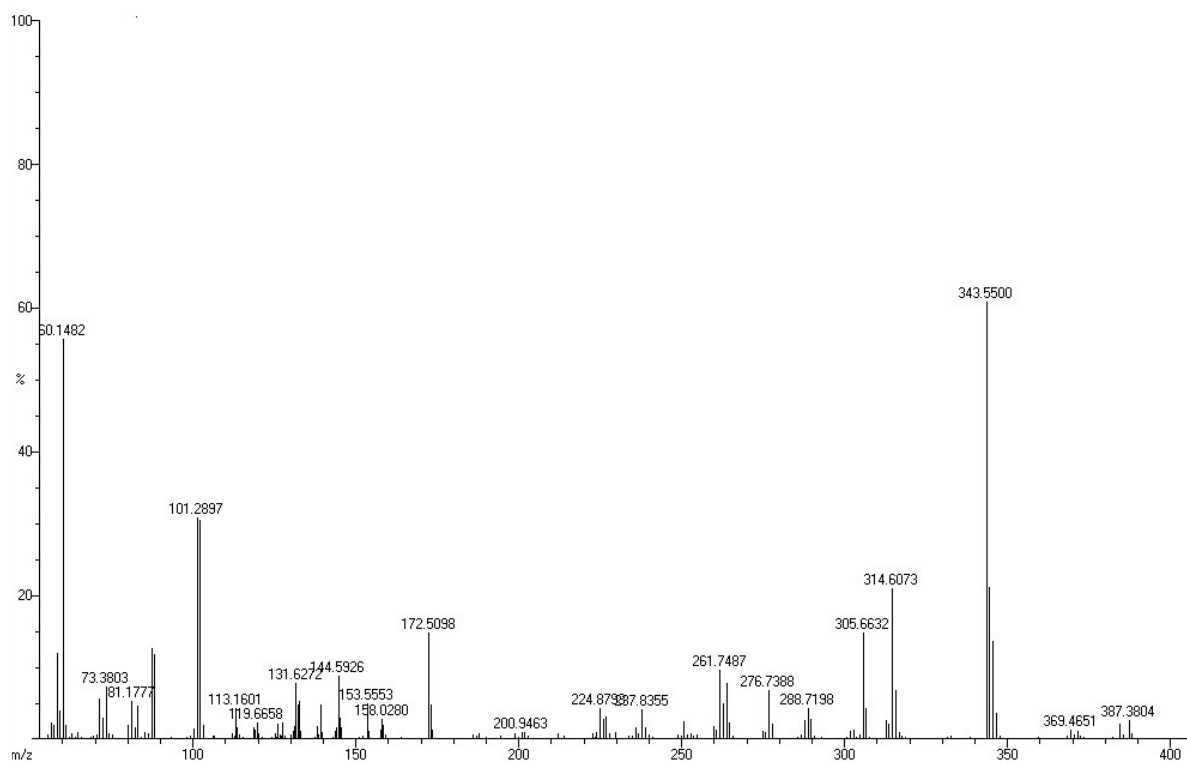

**Fig. S9:** EI-MASS Spectrum of 2-Cyano-3-(5-pyren-1-ylethynyl-furan-2-yl)-acrylic acid (PEFCC).

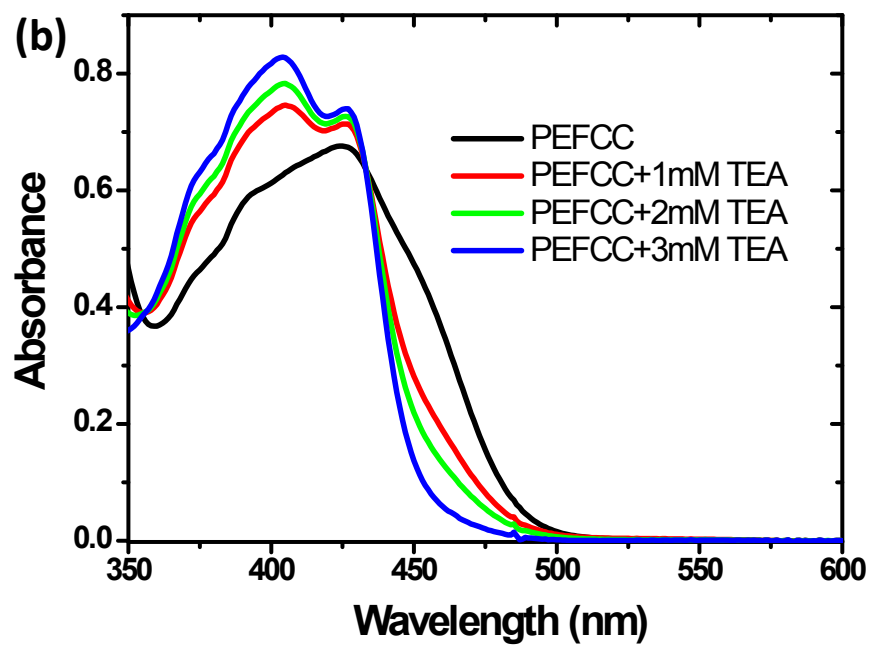

**Figure S10:** Absorption spectra of PEFCC with increasing concentrations of TEA.

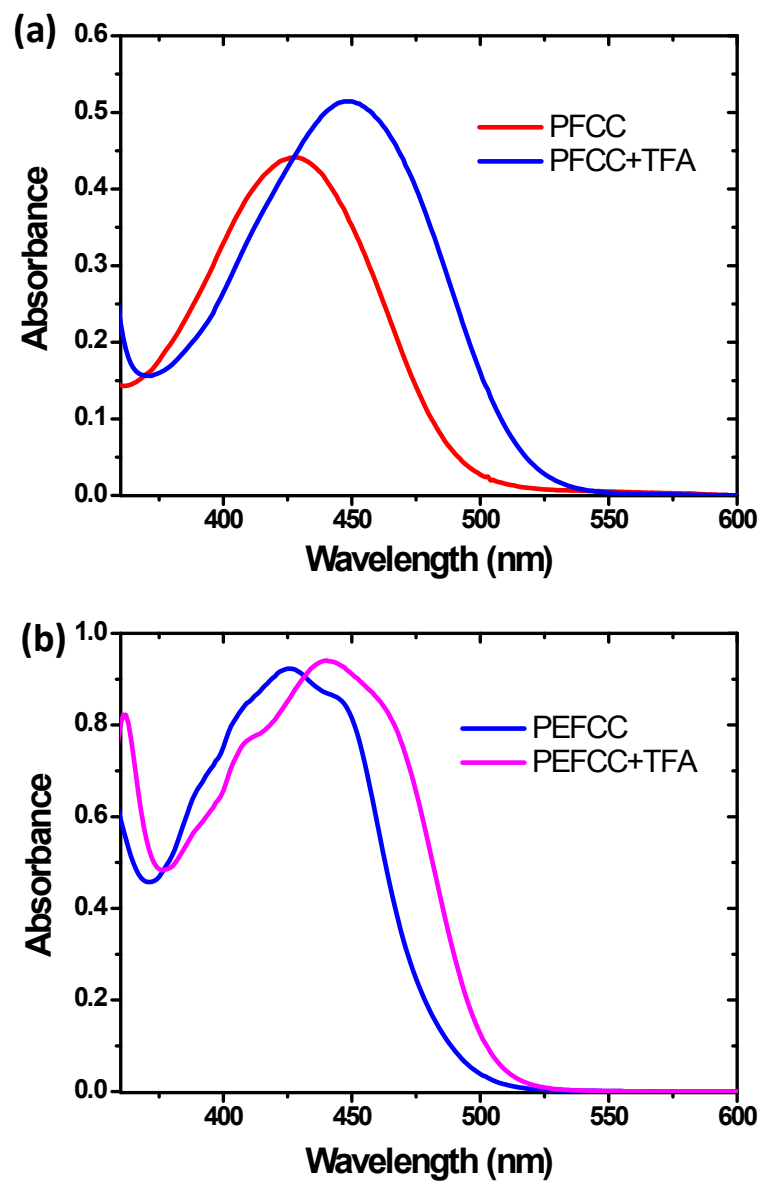

**Figure S11:** Absorption spectra of pyrene dyes recorded in THF before and after the addition of TFA.

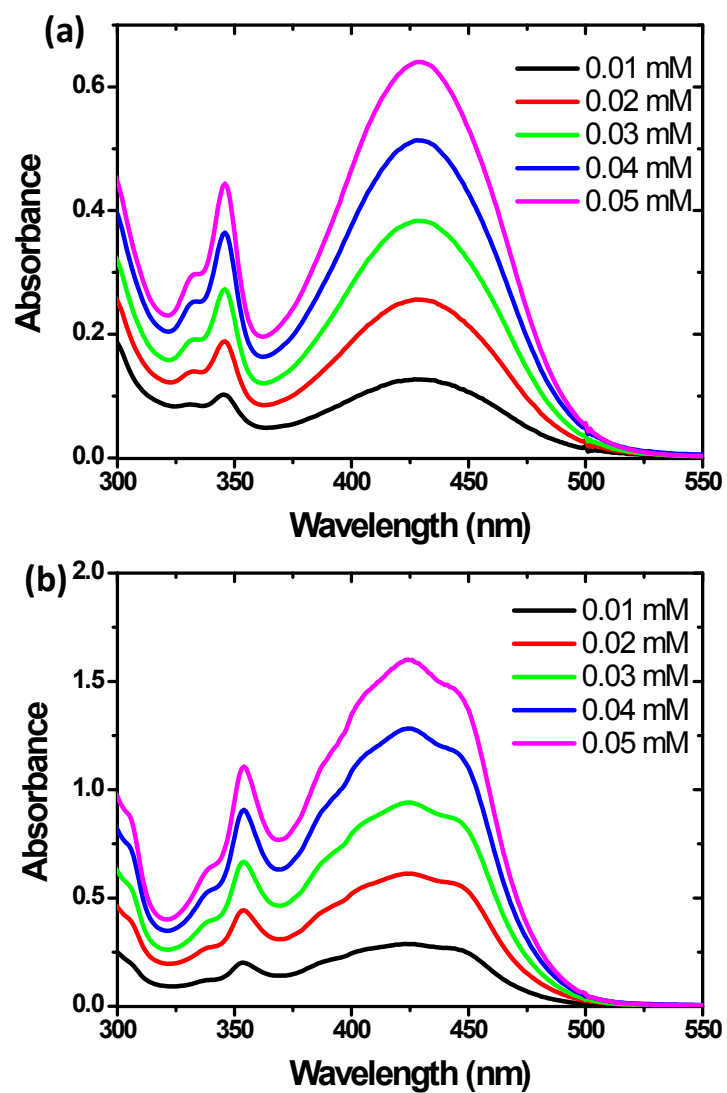

**Fig. S12:** Effect of dye concentration on the absorption spectra (a) PFCC (b) PEFCC

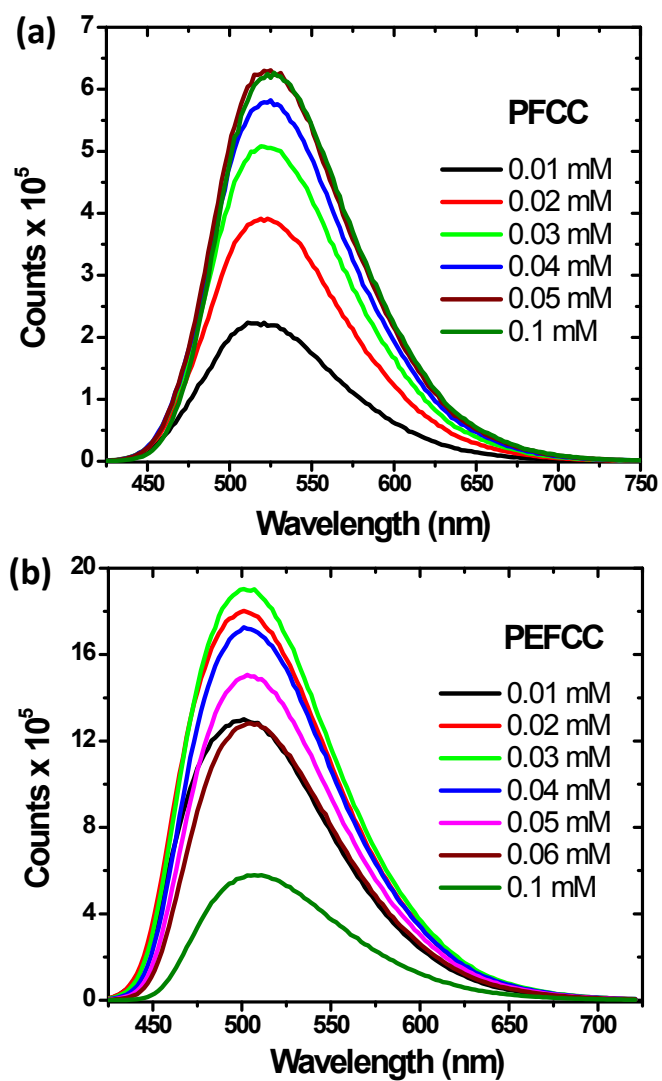

**Figure S13:** Effect of dye concentration on the emission spectra (a) PFCC (b) PEFCC



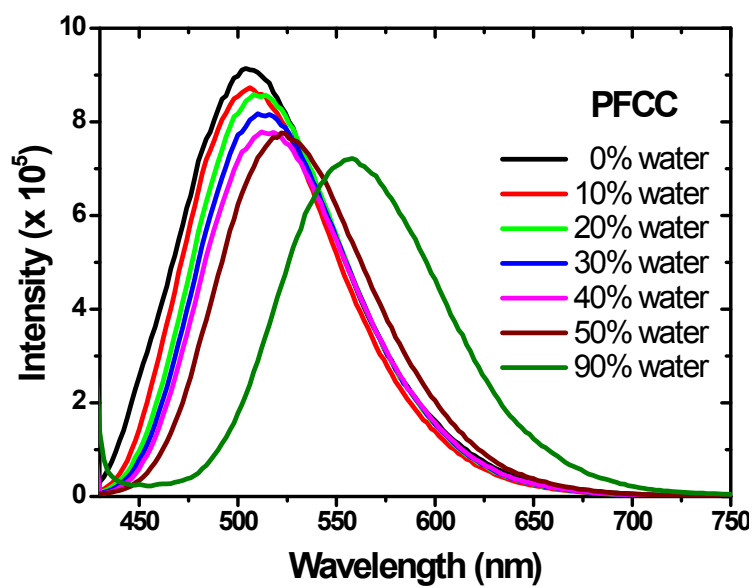

**Figure S14:** Aggregation induced emission changes of PEFCC dye with varying water fractions.

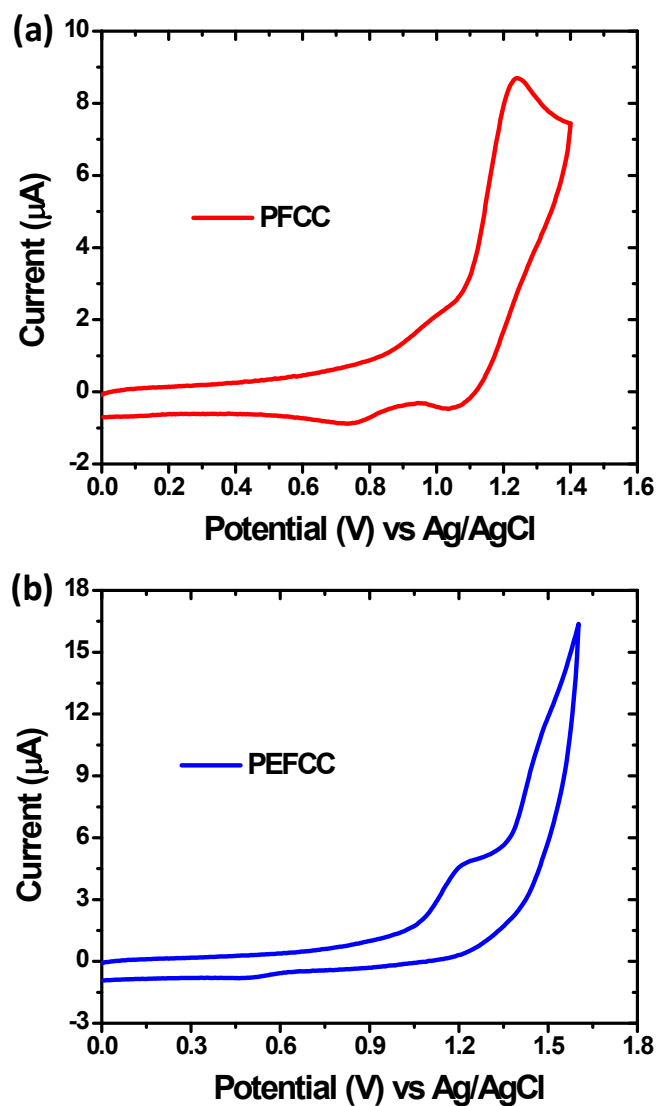

**Figure S15:** Cyclic voltammograms of pyrene derivatives( $1 \text{ mM}$ ) in  $\text{CH}_3\text{CN}$  containing  $0.1 \text{ M TBAPF}_6$  using  $\text{Ag}/\text{AgCl}$  as reference electrode with a scan rate of  $0.10 \text{ V/s}$  at  $298 \text{ K}$ . Potentials were measured vs  $\text{Ag}/\text{AgCl}$  and converted to a normal hydrogen electrode (NHE) by the addition of  $+0.2 \text{ V}$ .

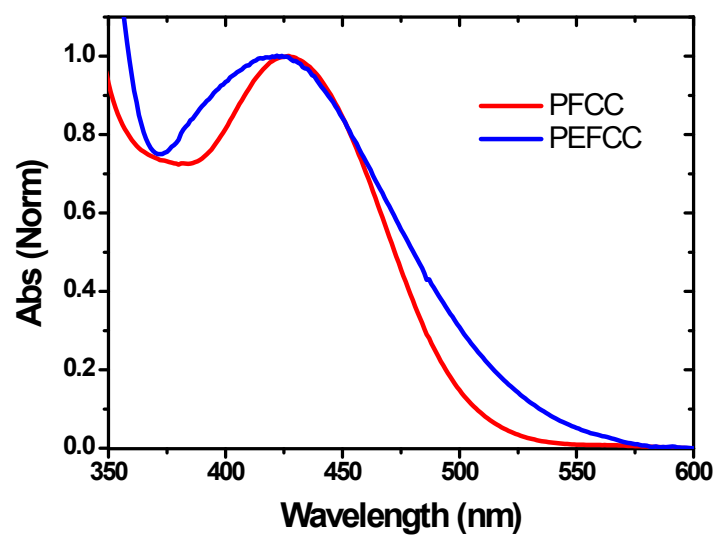

**Figure S16:** Normalized absorption spectra of pyrene derivatives on TiO<sub>2</sub> surface.

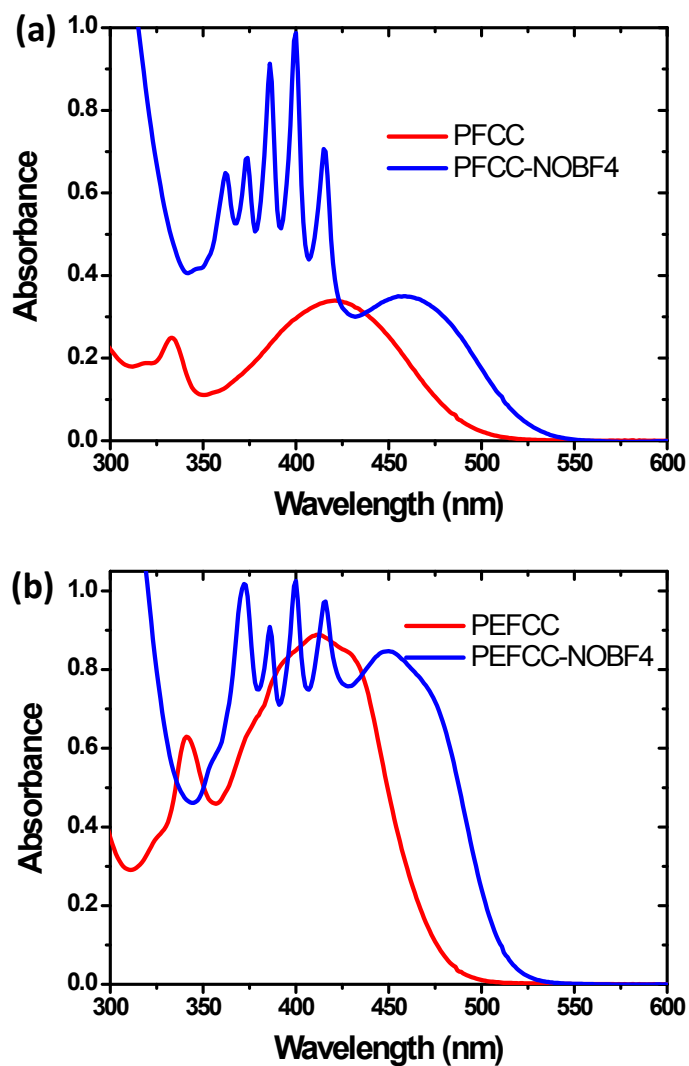

**Fig. S17:** Spectral changes of pyrene derivatives with nitrosonium tetrafluoroborate

**Table S1:** FMO molecular contributions

| Molecule |      | Donor | Bridge-1 | Bridge-2 | Acceptor |
|----------|------|-------|----------|----------|----------|
| PFCC     | HOMO | 83%   | -        | 13%      | 4%       |
|          | LUMO | 17%   | -        | 28%      | 55%      |
| PEFCC    | HOMO | 75%   | 9%       | 11%      | 5%       |
|          | LUMO | 16%   | 9%       | 27%      | 48%      |

## Reference:

- S1. A. Kathiravan, V. Srinivasan, T. Khamrang, M. Velusamy, M. Jaccob, N. Pavithra, S. Anandan and K. Velappan, *Phys. Chem. Chem. Phys.*, 2017, **19**, 3125-3135.
